# Supplementary material for: Cross-bay winds controlling primary production in Antarctic glacial bay
Source: Research Square preprint supplement (doi:10.21203/rs.3.rs-7019995/v1), 2025-07-30
Supplement: Supplementary file 1 [file 165c6d2f1e113857cc46ae33.pdf]

# Supplementary Information

## Cross-bay winds controlling primary production in Antarctic glacial bay

Maria Osińska<sup>1,2,\*</sup> and Agnieszka Herman<sup>2</sup>

<sup>1</sup>University of Gdańsk, Faculty of Oceanography and Geography, Gdańsk, 80-309, Poland

<sup>2</sup>Institute of Oceanology of Polish Academy of Sciences, Sopot, 81-712, Poland

\*corresponding.author: [maria.osinska@phdstud.ug.edu.pl](mailto:maria.osinska@phdstud.ug.edu.pl)

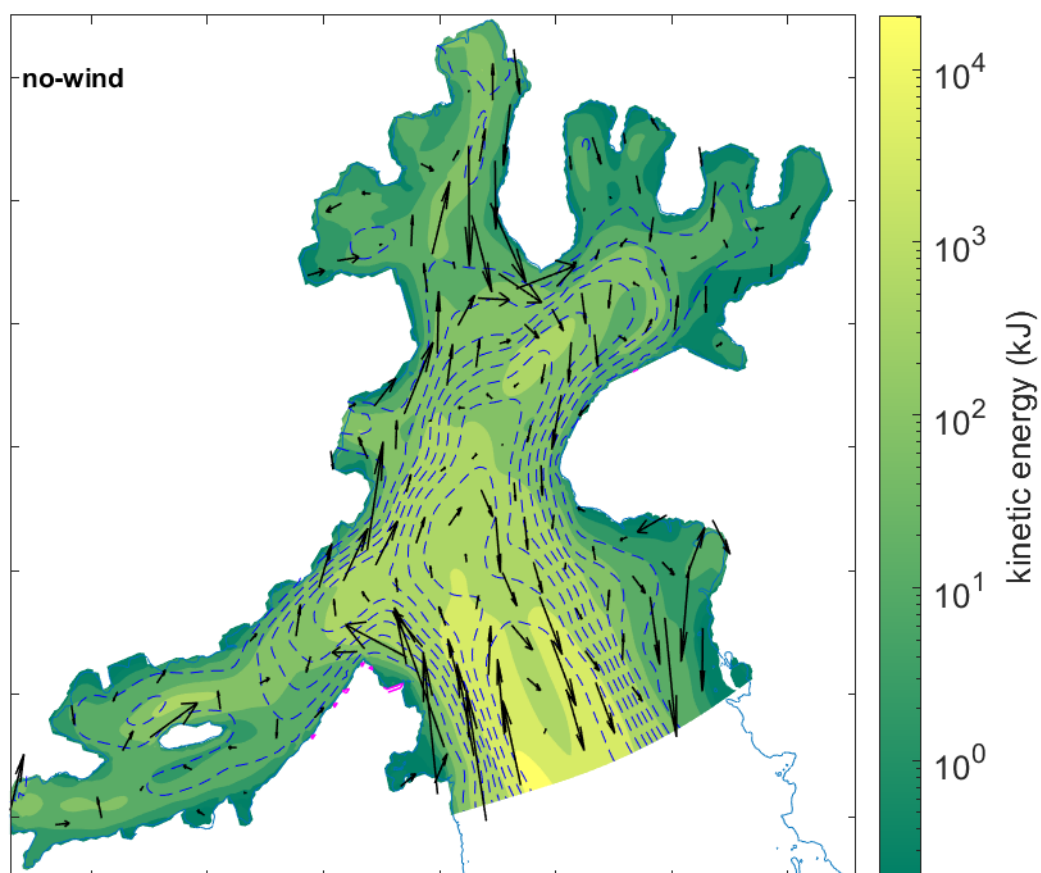

**Figure S1.** No-wind scenario kinetic energy and depth averaged velocities; colors represent kinetic energy integrated across the water column; arrows indicate depth-averaged horizontal velocity vectors; blue spaced lines show isobaths, with a magenta line highlighting the isobath =  $D_E$ . {Note}: showing mean values from Dec 7, 2021, to Jan 9, 2022 (33 days).

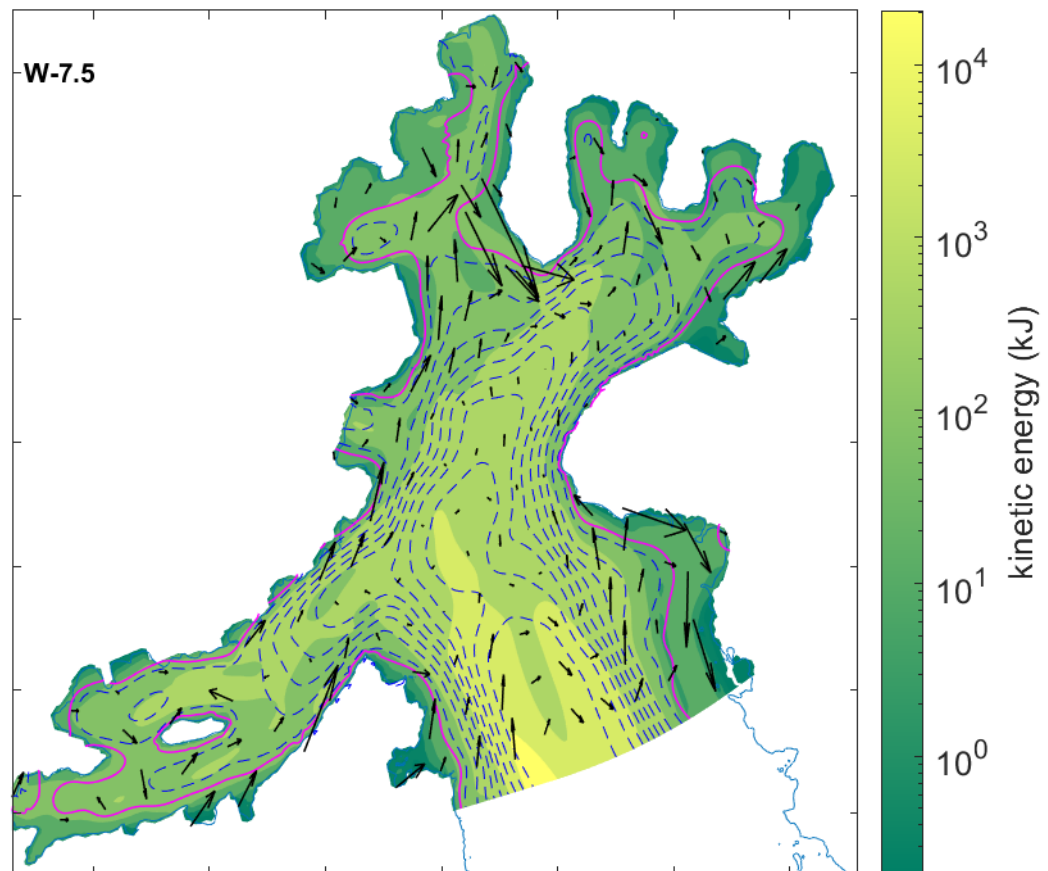

**Figure S2.** As in Fig. S1, but for W-7.5 scenario.

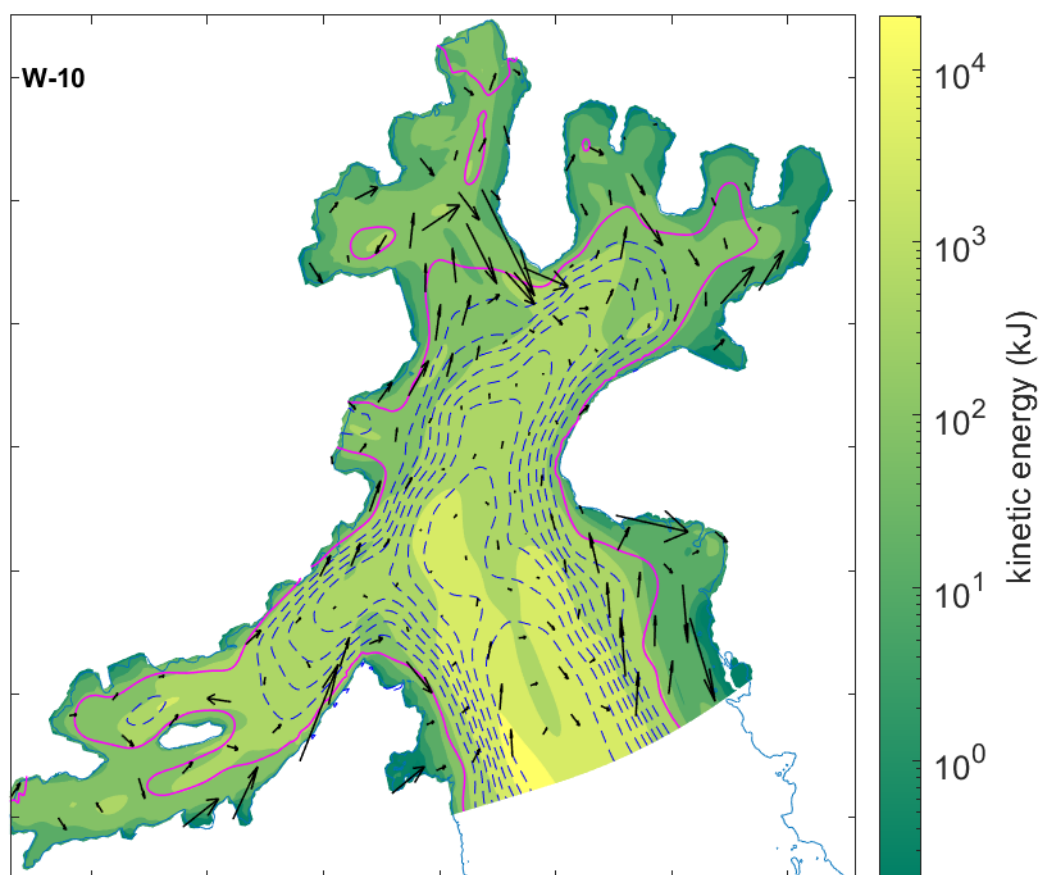

**Figure S3.** As in Fig. S1, but for W-10 scenario.

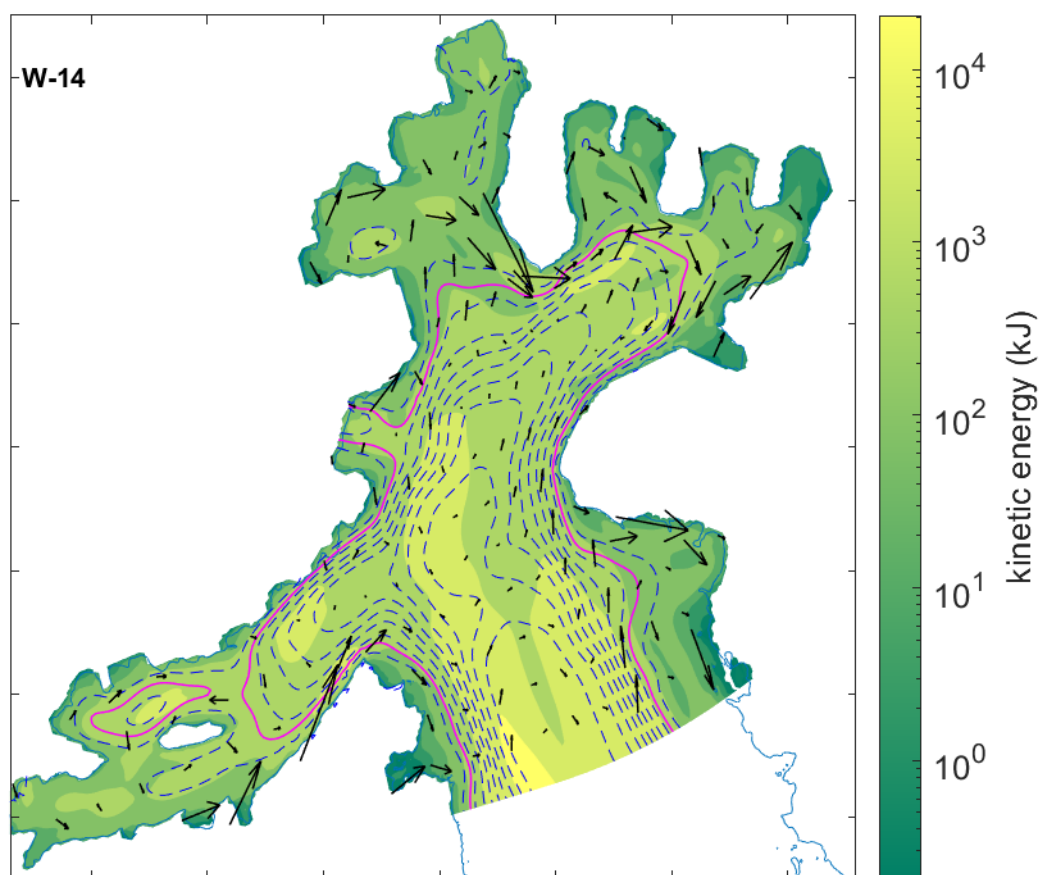

**Figure S4.** As in Fig. S1, but for W-14 scenario.

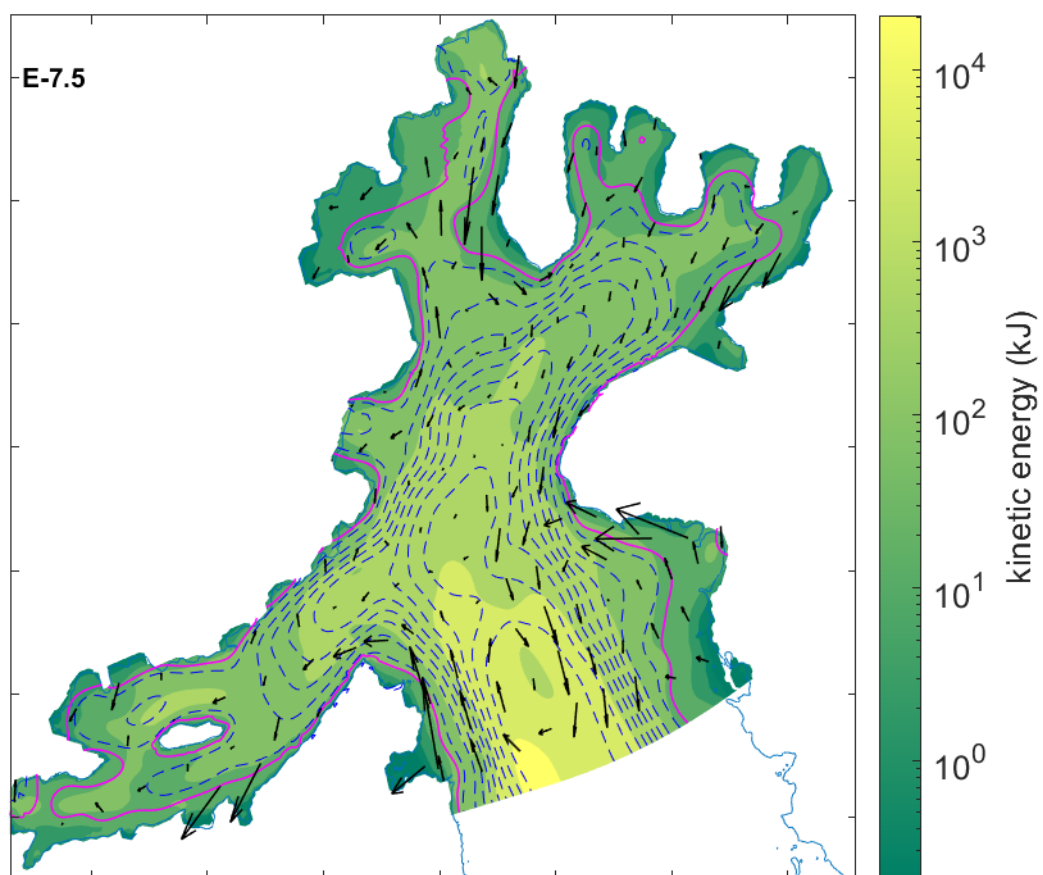

**Figure S5.** As in Fig. S1, but for E-7.5 scenario.

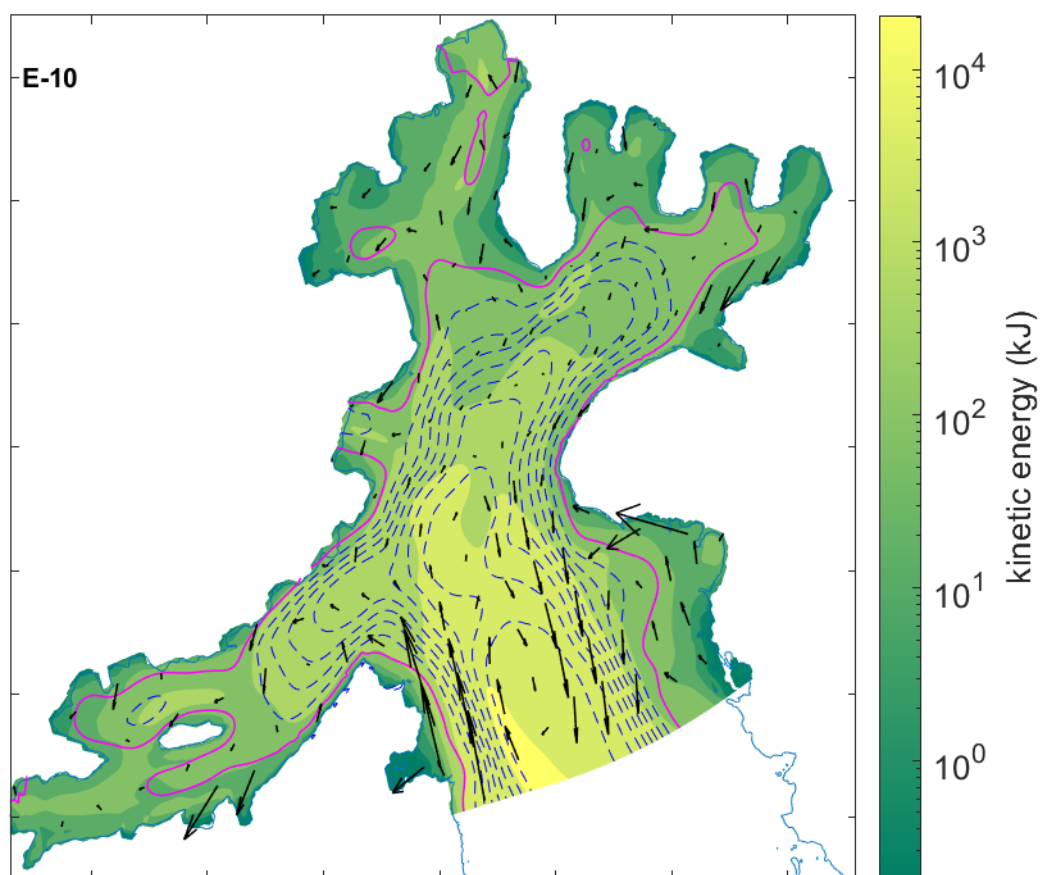

**Figure S6.** As in Fig. S1, but for E-10 scenario.

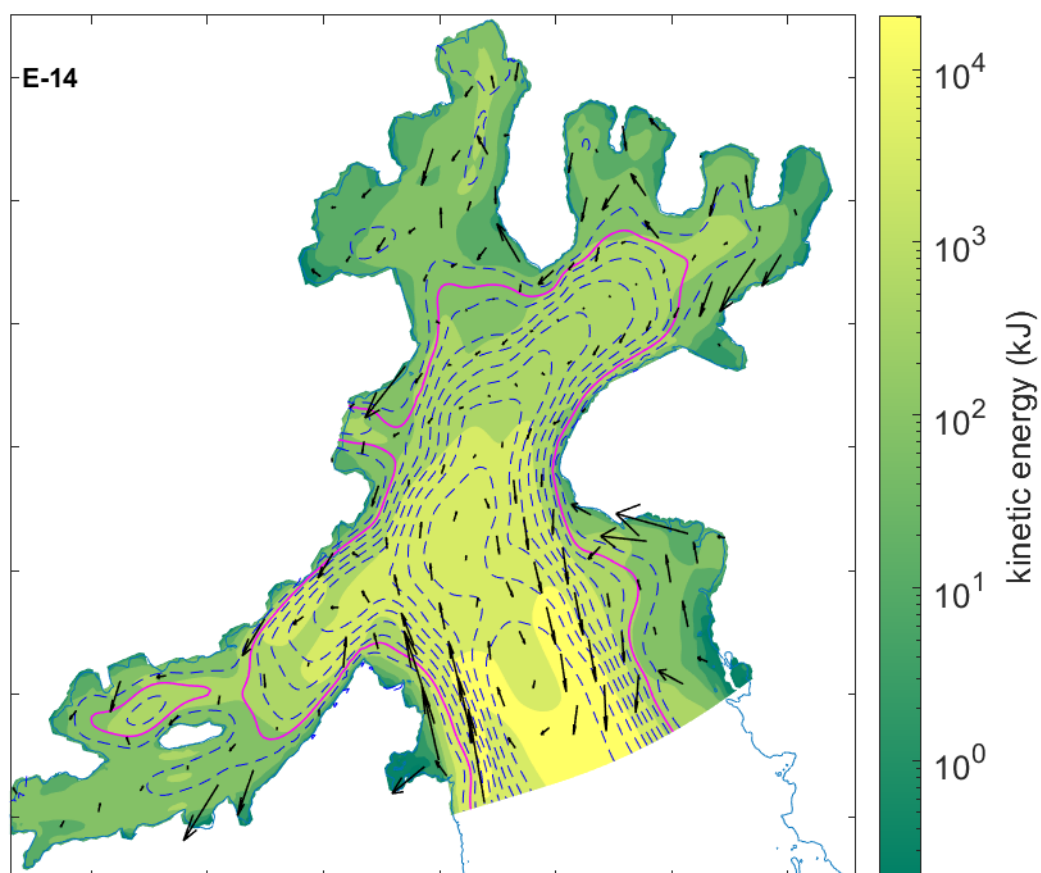

**Figure S7.** As in Fig. S1, but for E-14 scenario.

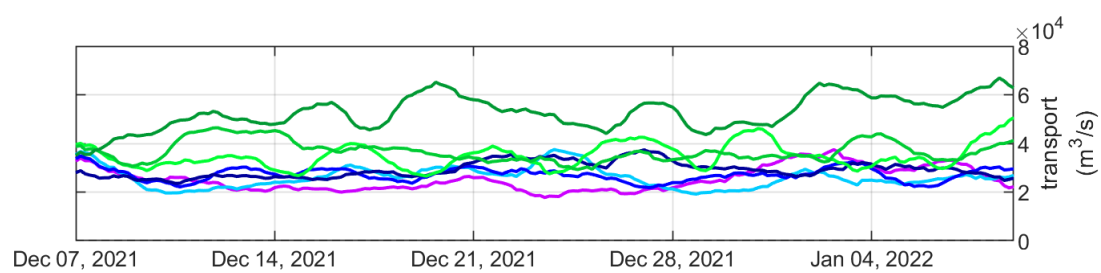

**Figure S8.** Volume of transport through the cross-section in the main AB (pink line in Fig. 1 b) in seven model scenarios.



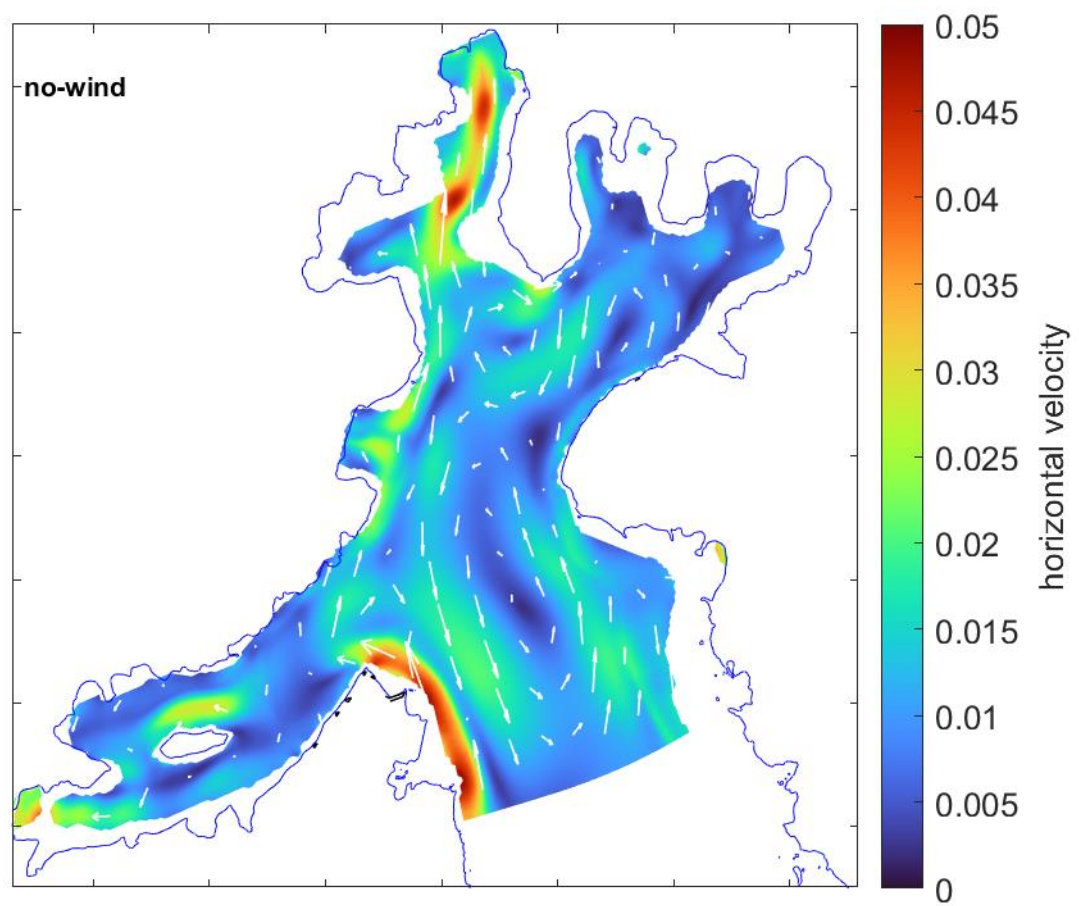

**Figure S9.** No-wind scenario horizontal velocities averaged across 10-100 m depth, with a black line highlighting the isobath  $= D_E$ . {Note}: showing mean values from Dec 7, 2021, to Jan 9, 2022 (33 days).

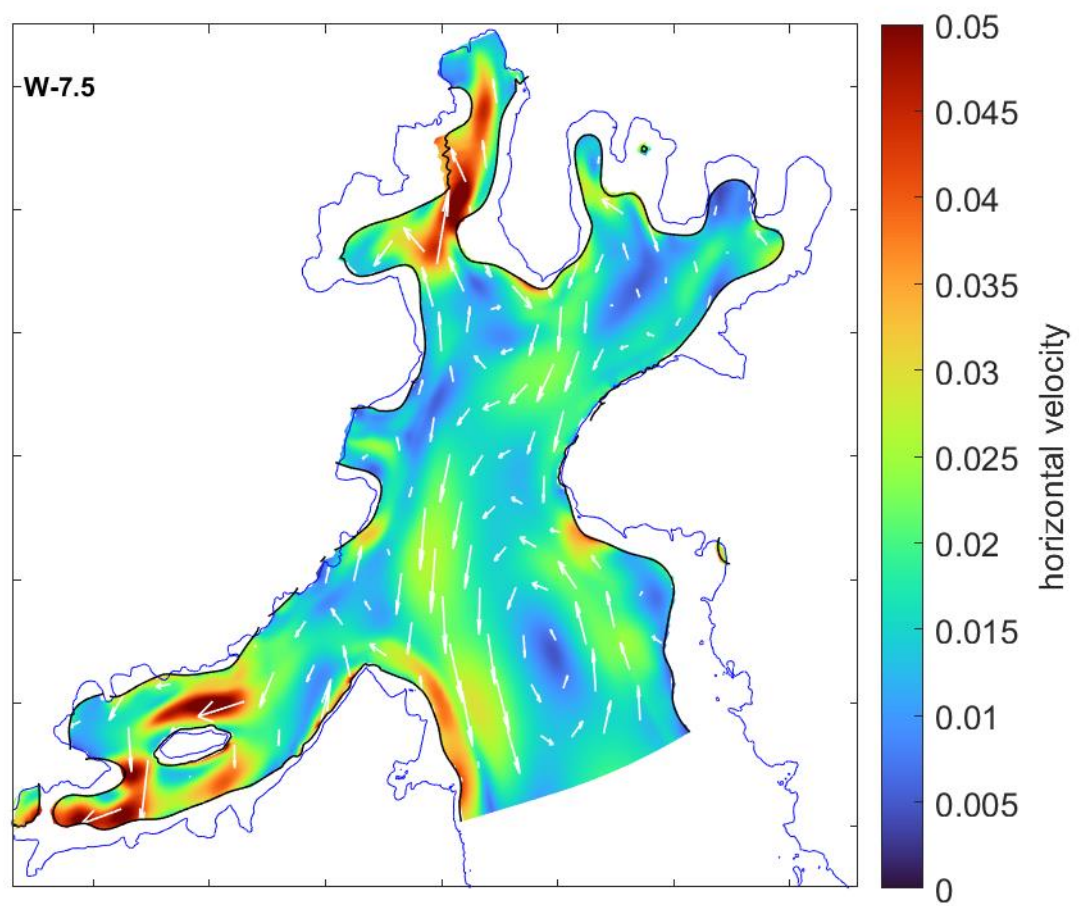

**Figure S10.** As in Fig. S9, but for W-7.5 scenario.

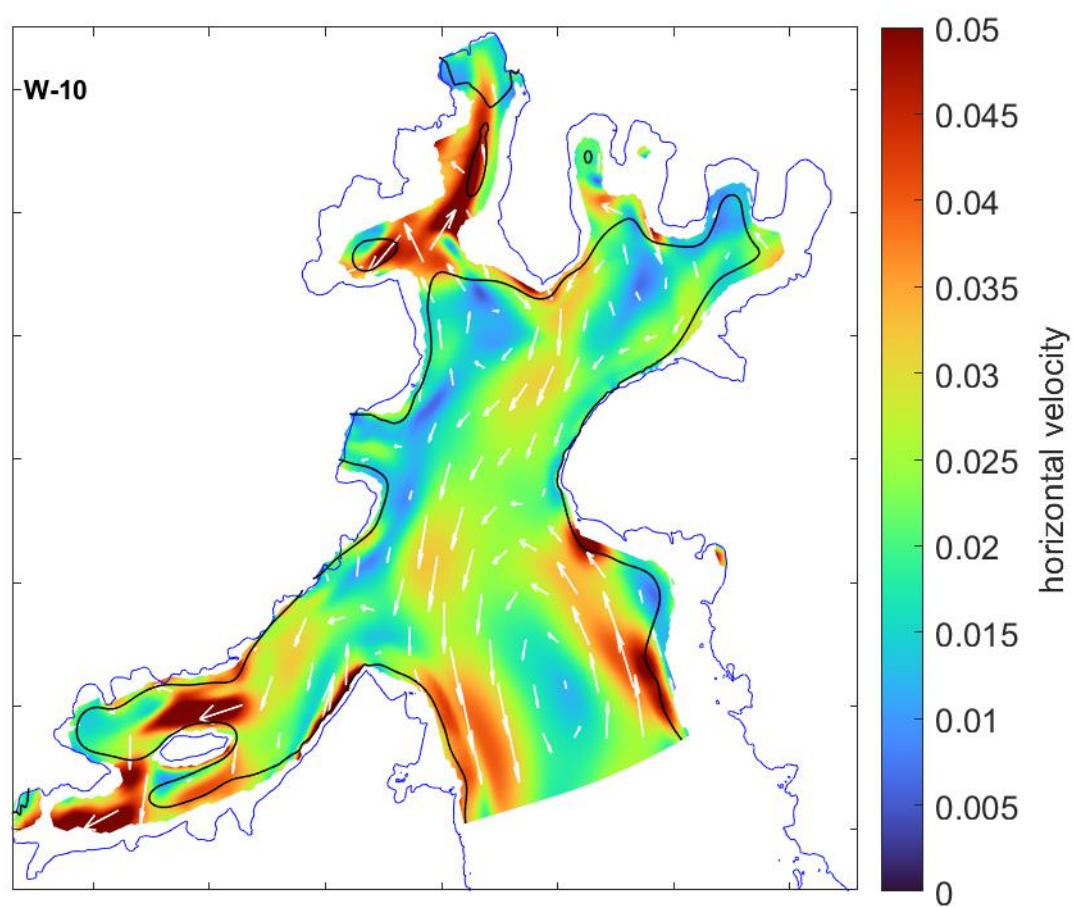

**Figure S11.** As in Fig. S9, but for W-10 scenario.

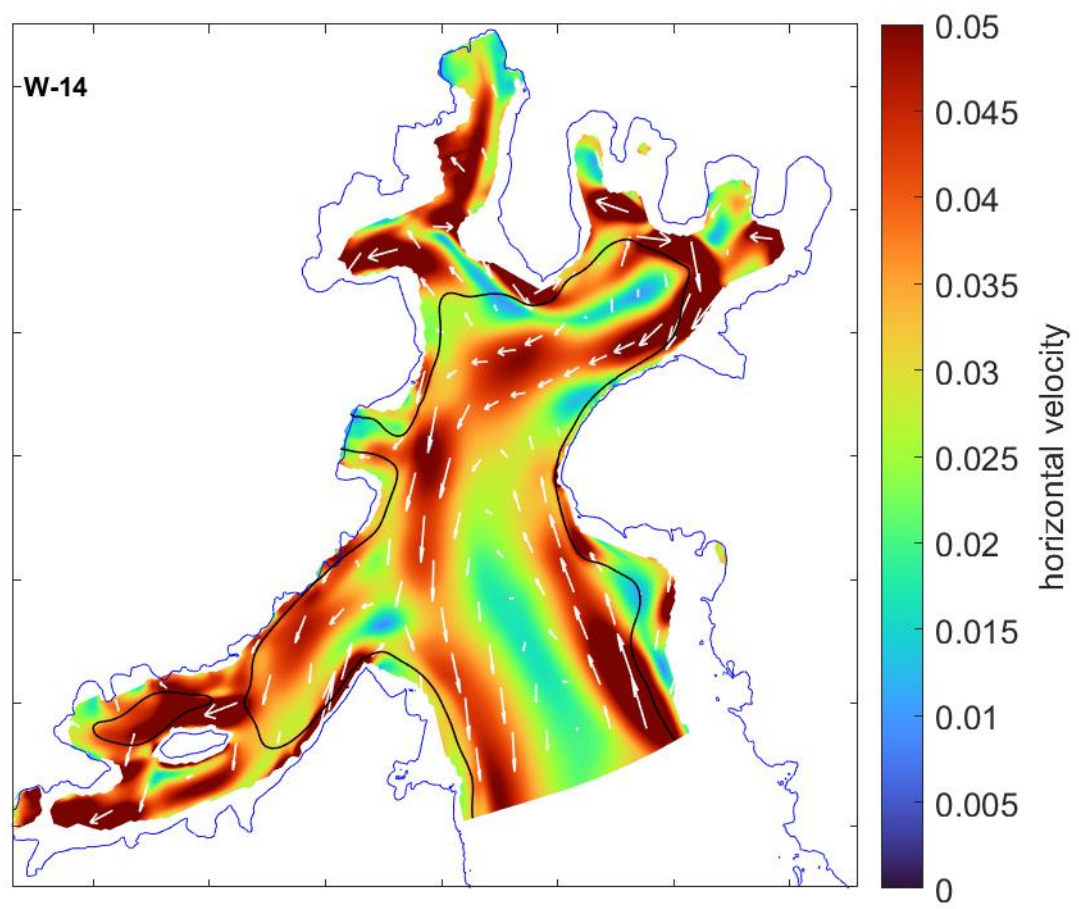

**Figure S12.** As in Fig. S9, but for W-14 scenario.

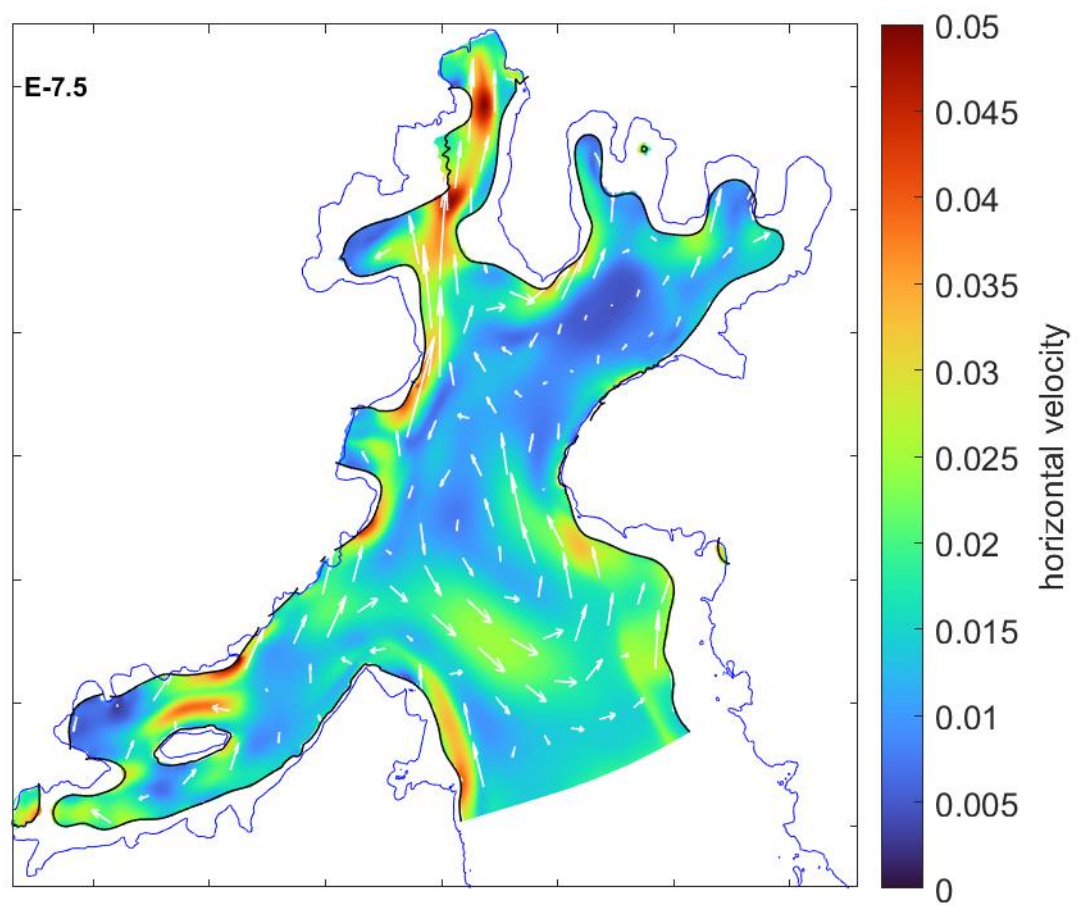

**Figure S13.** As in Fig. S9, but for E-7.5 scenario.

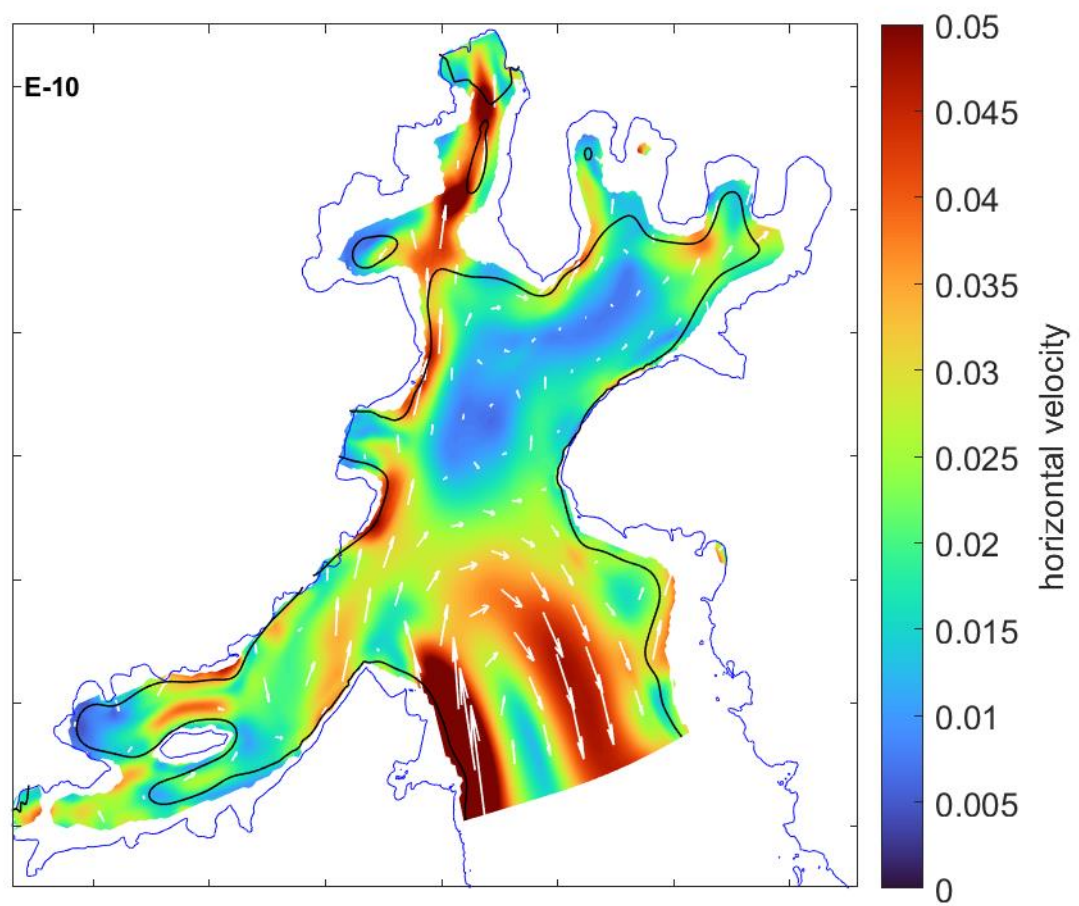

**Figure S14.** As in Fig. S9, but for E-10 scenario.



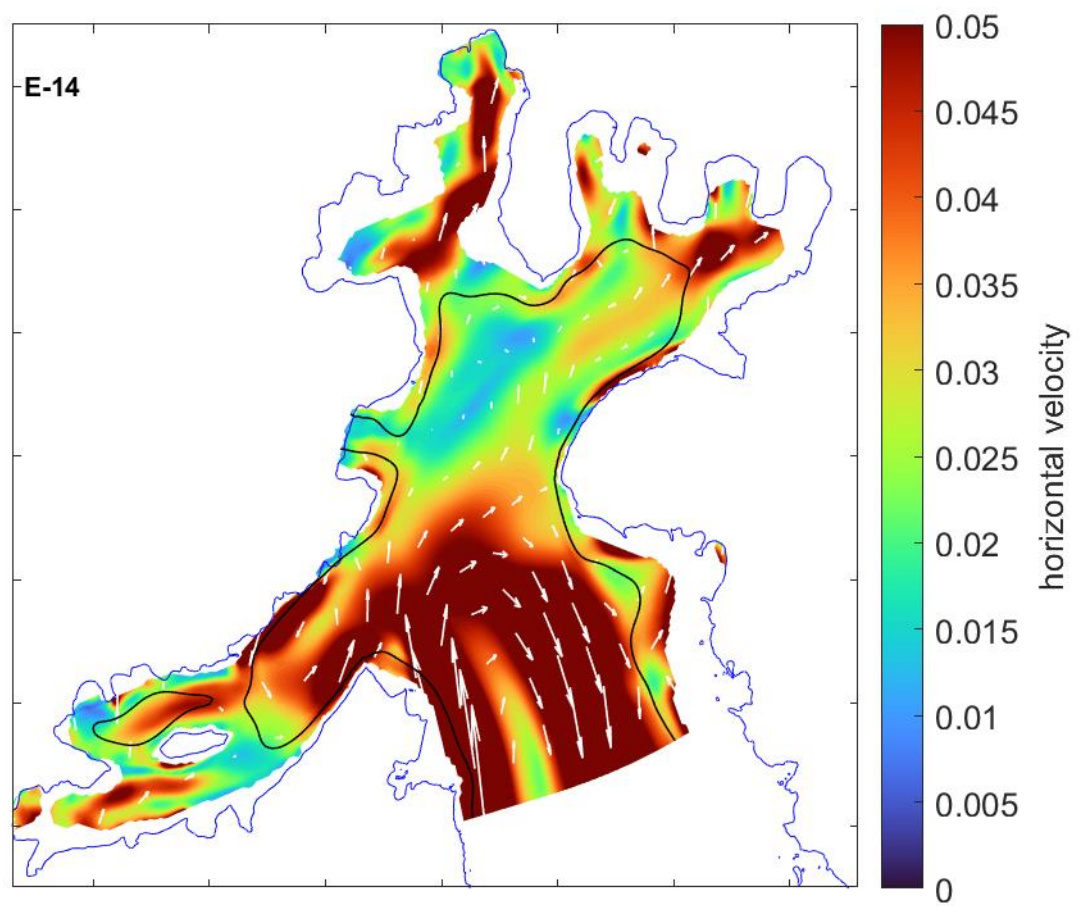

**Figure S15.** As in Fig. S9, but for E-14 scenario.

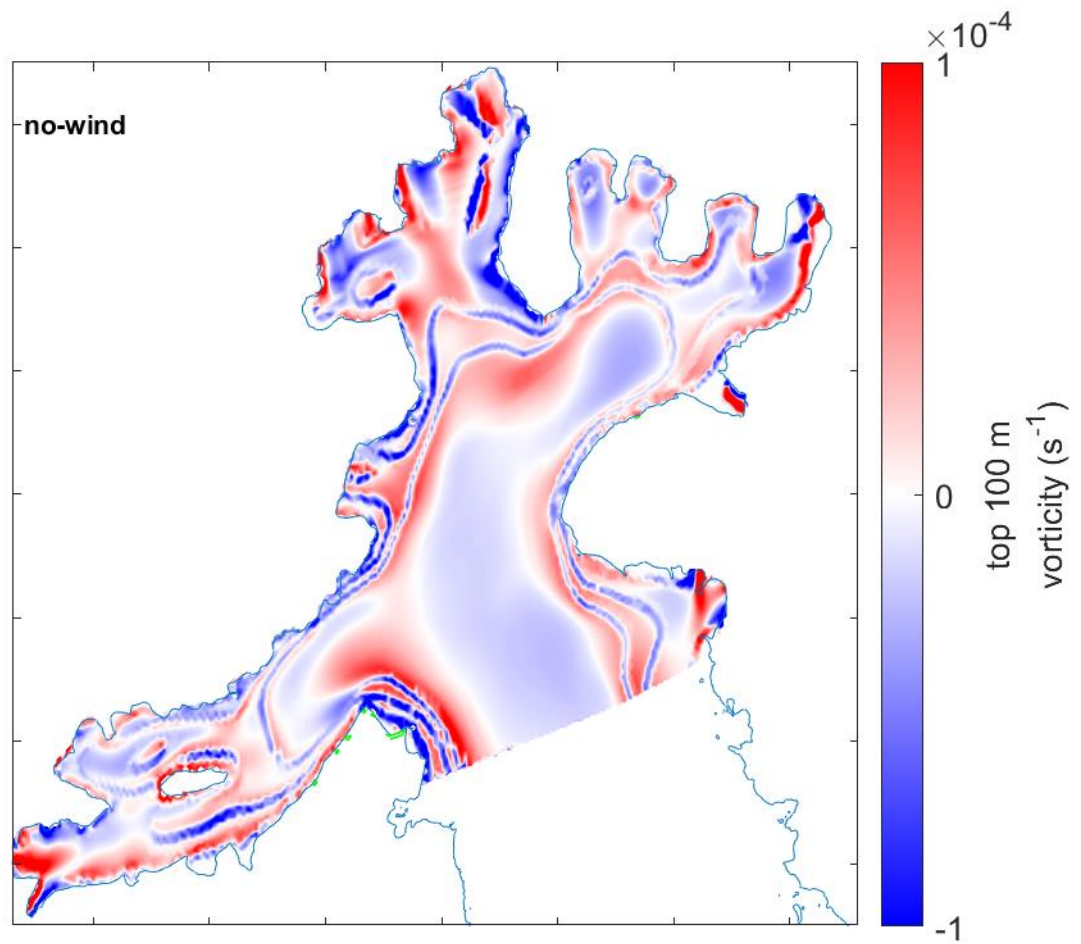

**Figure S16.** No-wind vorticity across 10-100 m depth. {Note}: showing mean values from Dec 7, 2021, to Jan 9, 2022 (33 days).



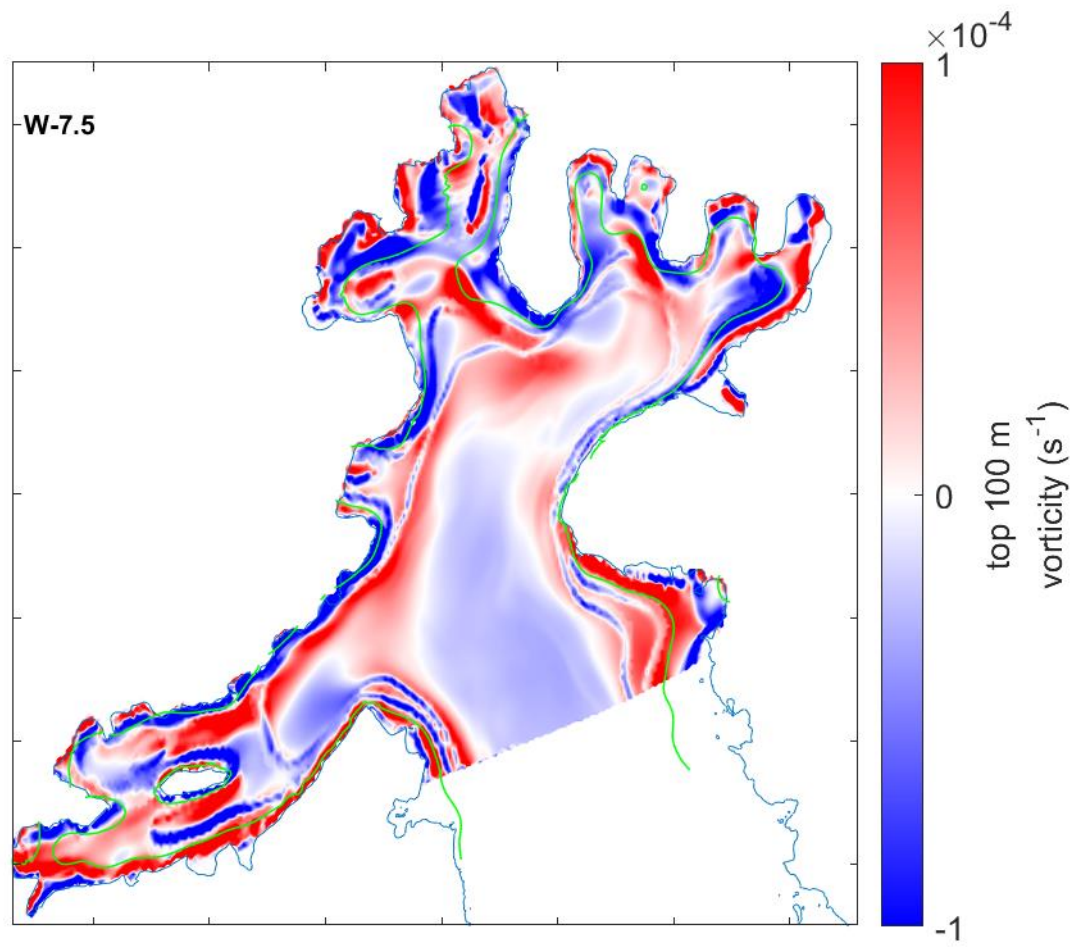

**Figure S17.** As in Fig. S16, but for W-7.5 scenario.

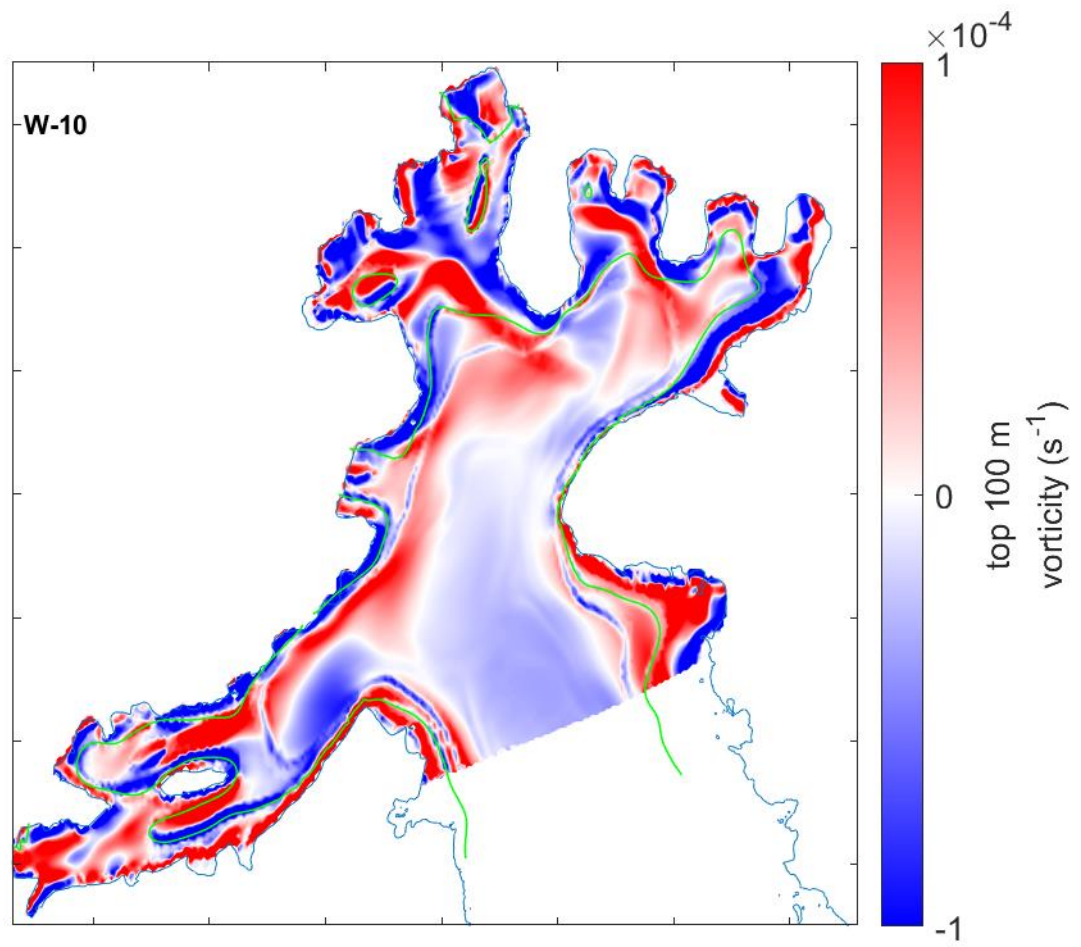

**Figure S18.** As in Fig. S16, but for W-10 scenario.

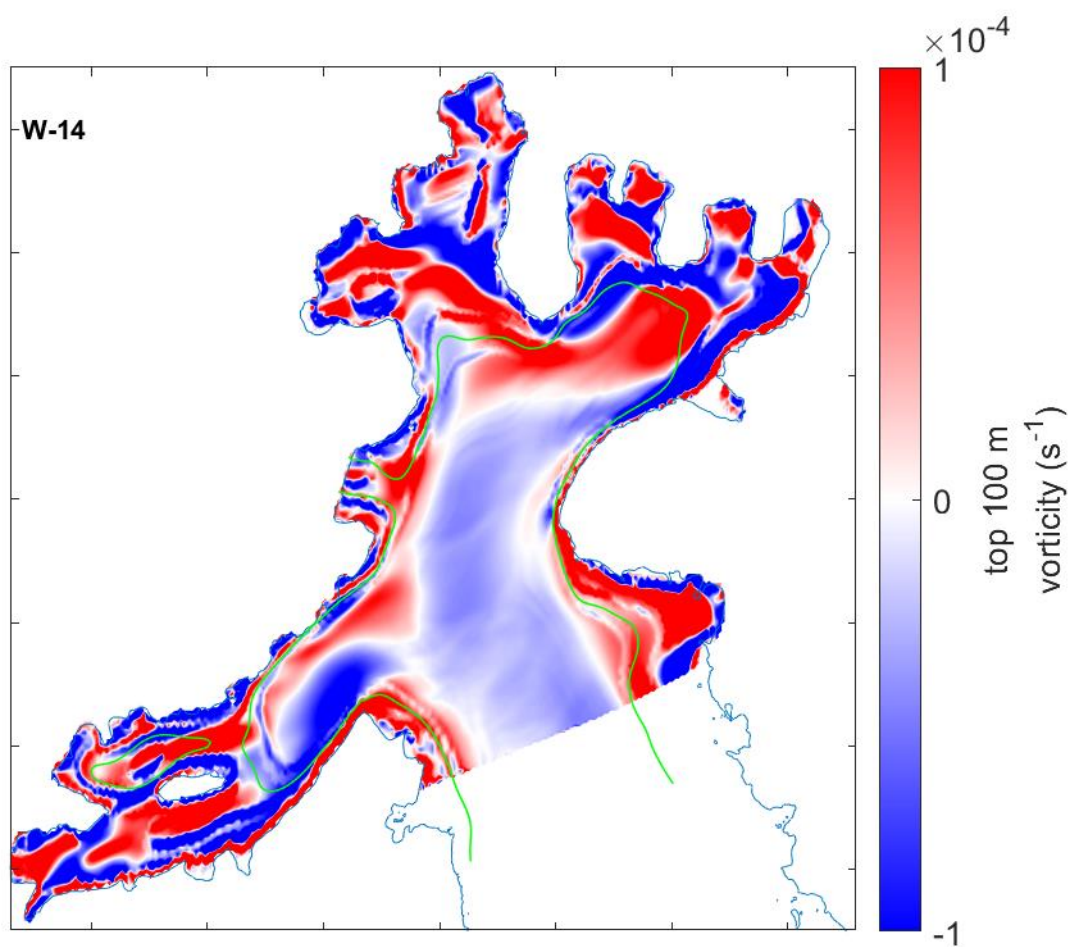

**Figure S19.** As in Fig. S16, but for W-14 scenario.

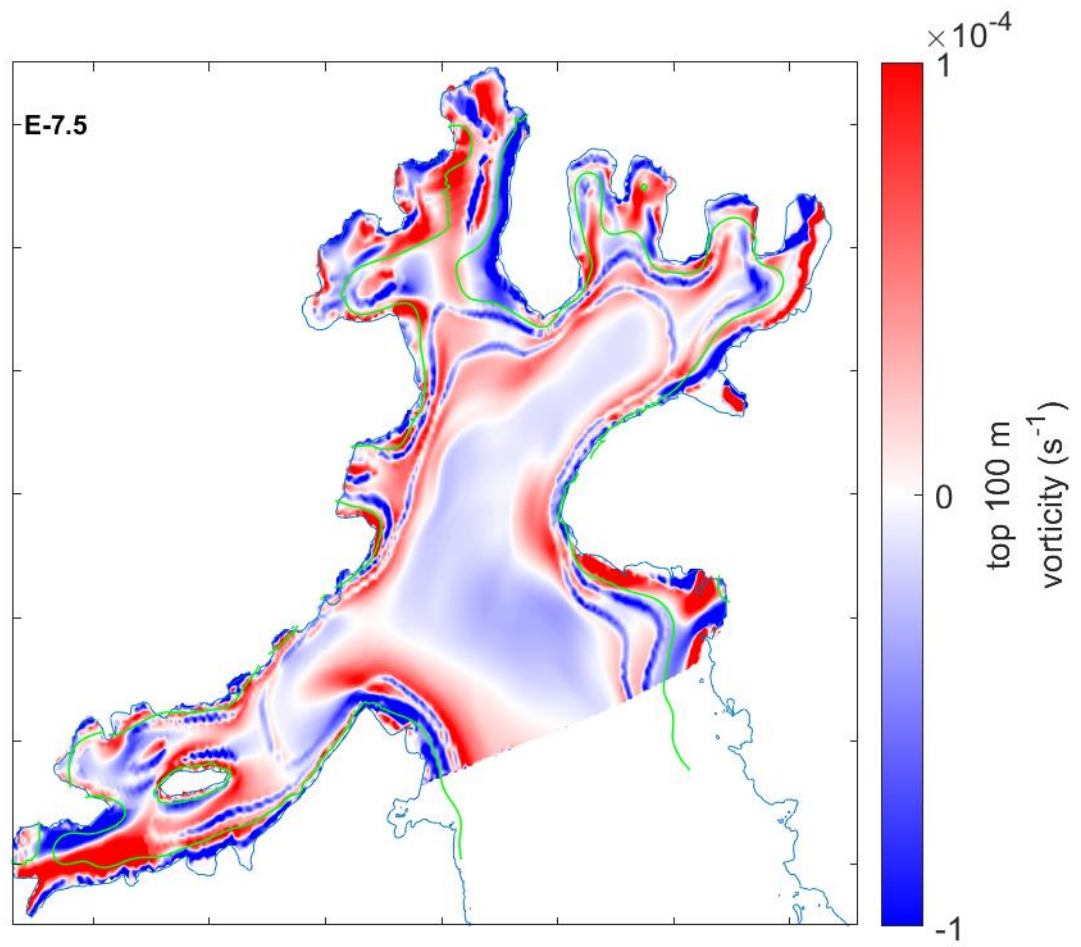

**Figure S20.** As in Fig. S16, but for E-7.5 scenario.

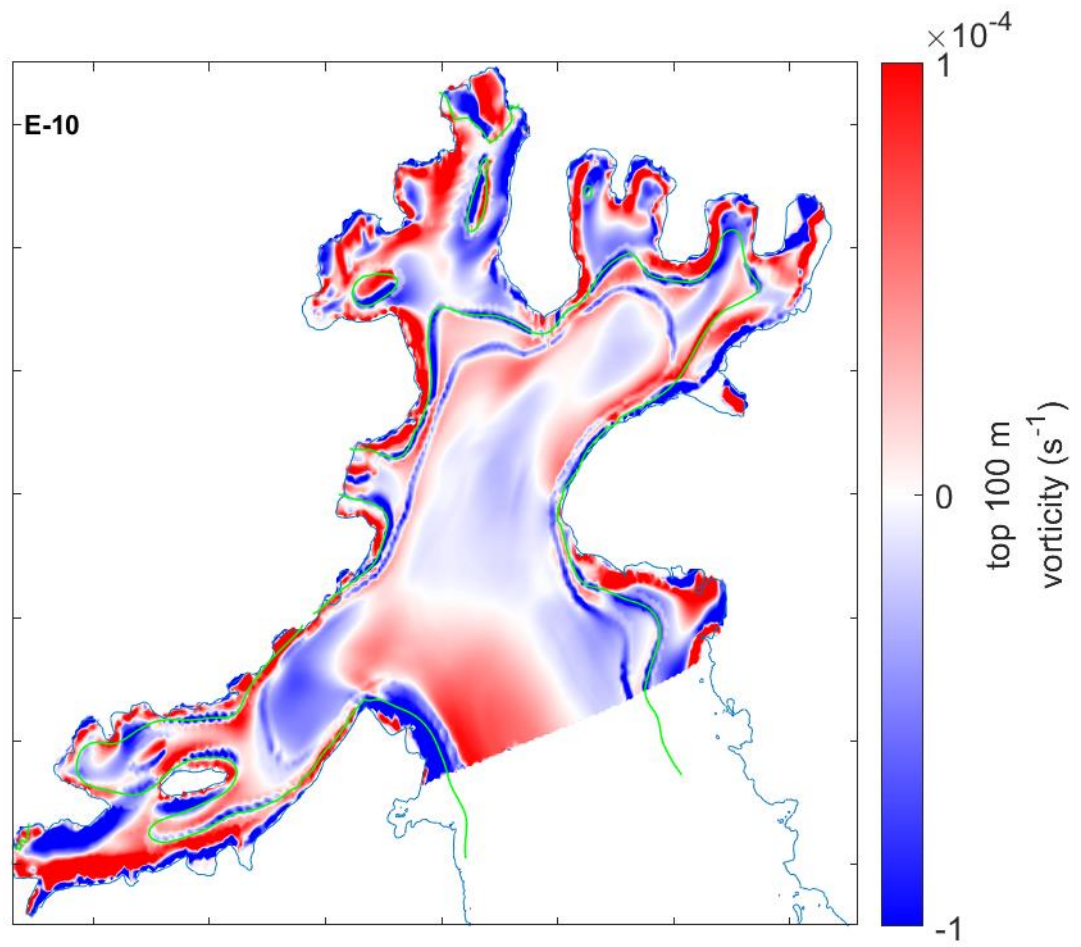

**Figure S21.** As in Fig. S16, but for E-10 scenario.

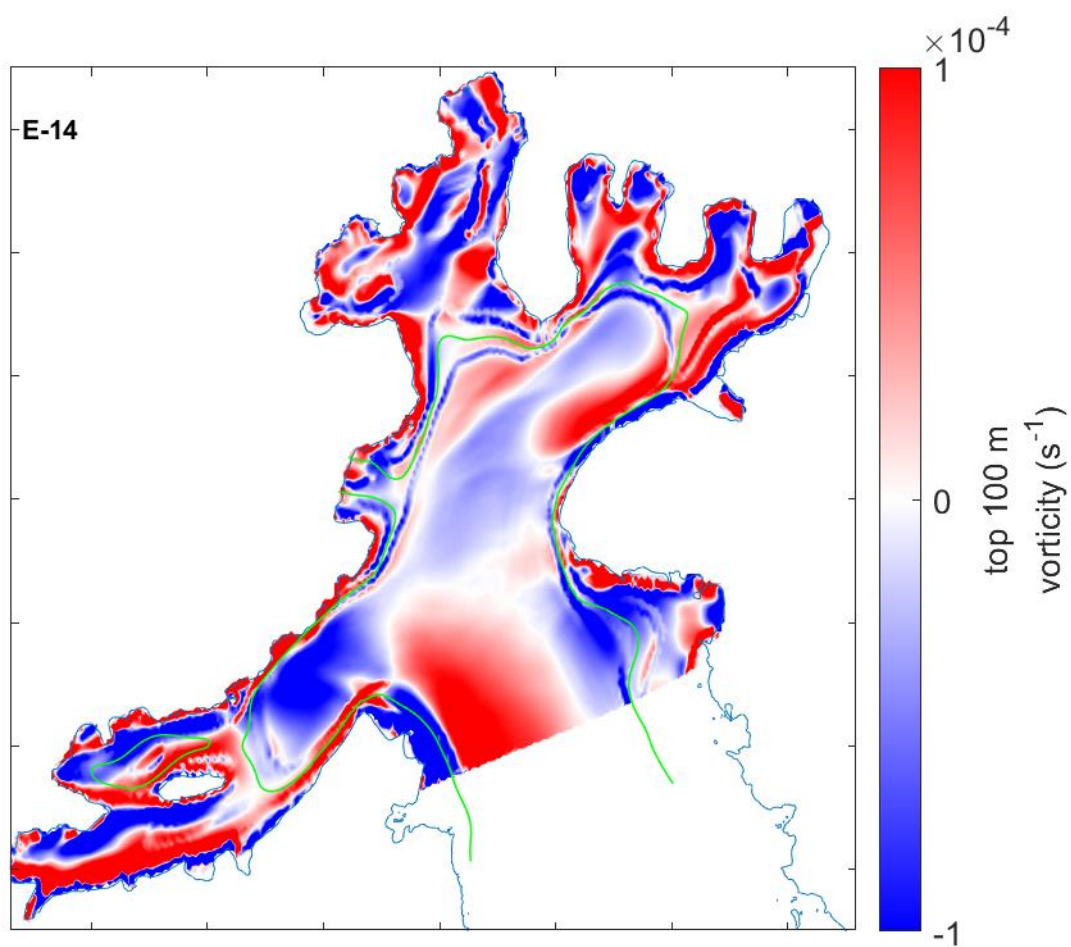

**Figure S22.** As in Fig. S16, but for E-14 scenario.
